# Supplementary material
Source: publisher site journal article supplement (https://www.dovepress.com/get_supplementary_file.php?f=471639.xlsx)
Supplement: Supplementary file 1 [file get_supplementary_file.php]

## Sheet: Sheet1
Supplementary table 1. Gene list of the mutation detection panel.
ACTB	CD79A	FOXO1	MYC	HIST2H2AB
B2M	CD79B	GNA13	MYD88	SOCS1
BCL2	CIITA	HIST1H1C	MYOM2	STAT3
BCL6	CREBBP	IGLL5	NRXN3	STAT6
BTG1	CXCR4	IRF4	P2RY8	TBL1XR1
BTG2	DDX3X	IRF8	PCLO	TMSB4X
CARD11	DTX1	KMT2D	PIM1	TNFAIP3
CCND3	EBF1	LRRN3	DUSP2	TNFRSF14
CD20	EP300	LYN	PRDM1	TP53
CD58	EZH2	MEF2B	ROBO2	TRAF2
CD70	FAS	ZFP36L1	SGK1	UBE2A
